# Supplementary material
Source: HighWire-hosted journal article supplement (http://www.cmaj.ca/highwire/filestream/71435/field_highwire_adjunct_files/3/180551-res-4-at.pdf)
Supplement: 180551-res-4-at.pdf [file 180551-res-4-at.pdf]

## Appendix 4 (as supplied by the authors)

Table 1. Baseline Characteristics of a Cohort of Older Adults Prescribed Trazodone or Atypical Antipsychotics using High Dimensional Propensity Score Model for Inverse Probability of Treatment Weighting

| Characteristic                    | Trazodone<br>N=6,588 | Atypical<br>Antipsychotics<br>N=2,875 | Crude<br>Standardized<br>Difference | Trazodone<br>N=6,587 | Atypical<br>Antipsychotics<br>N=2,875 | Weighted<br>Standardized<br>Difference |
|-----------------------------------|----------------------|---------------------------------------|-------------------------------------|----------------------|---------------------------------------|----------------------------------------|
| <i>Demographics</i>               |                      |                                       |                                     |                      |                                       |                                        |
| Age at cohort entry, mean (SD)    | 85.5 (7.2)           | 85.0 (7.1)                            | 0.07                                | 85.3 (7.2)           | 85.3 (7.2)                            | <0.01                                  |
| Age, n (%)                        |                      |                                       |                                     |                      |                                       |                                        |
| 66-74                             | 556 (8.4%)           | 236 (8.2%)                            | 0.01                                | 8.6%                 | 8.6%                                  | <0.01                                  |
| 75-84                             | 2,128 (32.3%)        | 1,004 (34.9%)                         | 0.06                                | 33.4%                | 33.2%                                 | <0.01                                  |
| 85+                               | 3,904 (59.3%)        | 1,635 (56.9%)                         | 0.05                                | 58.1%                | 58.2%                                 | <0.01                                  |
| Female, n (%)                     | 4,594 (69.7%)        | 1,908 (66.4%)                         | 0.07                                | 68.6%                | 67.8%                                 | 0.02                                   |
| Weight at cohort entry, mean (SD) | 65.9 (29.1)          | 65.2 (30.0)                           | 0.02                                | 65.6 (28.8)          | 65.1 (26.0)                           | 0.02                                   |
| Income quintile                   |                      |                                       |                                     |                      |                                       |                                        |
| missing                           | 66 (1.0%)            | 36 (1.3%)                             | 0.02                                | 0.9%                 | 1.5%                                  | 0.05                                   |
| 1                                 | 1,549 (23.5%)        | 663 (23.1%)                           | 0.01                                | 23.3%                | 22.9%                                 | <0.01                                  |
| 2                                 | 1,274 (19.3%)        | 532 (18.5%)                           | 0.02                                | 19.3%                | 18.7%                                 | 0.02                                   |
| 3                                 | 1,335 (20.3%)        | 600 (20.9%)                           | 0.01                                | 20.5%                | 21.3%                                 | 0.02                                   |
| 4                                 | 1,254 (19.0%)        | 508 (17.7%)                           | 0.04                                | 18.8%                | 18.0%                                 | 0.02                                   |
| 5                                 | 1,110 (16.8%)        | 536 (18.6%)                           | 0.05                                | 17.3%                | 17.8%                                 | 0.01                                   |
| Dependency in $\geq$ 1 ADLs       | 6,556 (99.5%)        | 2,859 (99.4%)                         | 0.01                                | 99.6%                | 99.5%                                 | <0.01                                  |
| Dependency in ADLs, mean (SD)     | 5.2 (1.3)            | 5.4 (1.2)                             | 0.12                                | 5.3 (1.3)            | 5.3 (1.2)                             | 0.04                                   |
| <i>Healthcare Utilization</i>     |                      |                                       |                                     |                      |                                       |                                        |
| Prescriptions, mean (SD)          | 19.4 (10.0)          | 17.6 (9.7)                            | 0.18                                | 18.9 (9.9)           | 19.2 (10.3)                           | 0.03                                   |
| ER visits, mean (SD)              | 1.5 (2.8)            | 1.4 (2.0)                             | 0.05                                | 1.5 (2.7)            | 1.6 (2.1)                             | 0.03                                   |
| Psychiatrist visits, mean (SD)    | 0.3 (2.4)            | 0.4 (2.4)                             | 0.03                                | 0.4 (2.6)            | 0.4 (2.1)                             | <0.01                                  |

|                                       |               |               |      |           |           |       |
|---------------------------------------|---------------|---------------|------|-----------|-----------|-------|
| Geriatrician visits, mean (SD)        | 0.6 (3.5)     | 0.6 (2.9)     | 0    | 0.6 (3.4) | 0.9 (5.4) | 0.08  |
| Inpatient hospitalizations, mean (SD) | 0.7 (1.0)     | 0.6 (1.0)     | 0.09 | 0.6 (1.0) | 0.6 (1.0) | 0.02  |
| Johns Hopkins ACG score, n (%)        |               |               |      |           |           |       |
| 0-5                                   | 1,601 (24.3%) | 812 (28.2%)   | 0.09 | 25.0%     | 26.0%     | 0.02  |
| 6-10                                  | 2,173 (33.0%) | 965 (33.6%)   | 0.01 | 40.9%     | 42.8%     | 0.06  |
| 11+                                   | 2,814 (42.7%) | 1,098 (38.2%) | 0.09 | 34.0%     | 31.3%     | 0.04  |
| <i>Medications</i>                    |               |               |      |           |           |       |
| Antiarrhythmics, n (%)                | 2,981 (45.2%) | 1,060 (36.9%) | 0.17 | 43.2%     | 41.3%     | 0.04  |
| Anticoagulants, n (%)                 | 1,498 (22.7%) | 515 (17.9%)   | 0.12 | 21.2%     | 22.2%     | 0.02  |
| Hypoglycemics, n (%)                  | 1,416 (21.5%) | 570 (19.8%)   | 0.04 | 20.8%     | 20.6%     | <0.01 |
| Antihypertensives, n (%)              | 4,606 (69.9%) | 1,895 (65.9%) | 0.09 | 68.5%     | 68.5%     | <0.01 |
| Antilipemics, n (%)                   | 3,015 (45.8%) | 1,252 (43.5%) | 0.04 | 45.1%     | 45.0%     | <0.01 |
| Diuretics, n (%)                      | 2,301 (34.9%) | 798 (27.8%)   | 0.16 | 32.8%     | 32.6%     | <0.01 |
| Glucocorticoids, n (%)                | 607 (9.2%)    | 205 (7.1%)    | 0.08 | 8.5%      | 8.6%      | <0.01 |
| Hormone therapies, n (%)              | 150 (2.3%)    | 32 (1.1%)     | 0.09 | 2.2%      | 1.8%      | 0.03  |
| Osteoporosis treatments, n (%)        | 1,551 (23.5%) | 663 (23.1%)   | 0.01 | 23.5%     | 22.9%     | 0.01  |
| Antiparkinsonian agents, n (%)        | 501 (7.6%)    | 220 (7.7%)    | 0    | 7.5%      | 8.4%      | 0.03  |
| Antiplatelets, n (%)                  | 1,089 (16.5%) | 406 (14.1%)   | 0.07 | 15.8%     | 16.2%     | <0.01 |
| Pain treatments, n (%)                | 2,892 (43.9%) | 1,106 (38.5%) | 0.11 | 41.9%     | 42.6%     | 0.02  |
| Psychoactive agents, n (%)            | 4,842 (73.5%) | 2,273 (79.1%) | 0.13 | 75.1%     | 76.4%     | 0.03  |
| <i>Medical History</i>                |               |               |      |           |           |       |
| Alcoholism, n (%)                     | 329 (5.0%)    | 128 (4.5%)    | 0.03 | 5.2%      | 5.4%      | <0.01 |
| Cardiac dysrhythmias, n (%)           | 1,838 (27.9%) | 683 (23.8%)   | 0.09 | 26.7%     | 26.3%     | <0.01 |

|                                    |               |               |      |       |       |       |
|------------------------------------|---------------|---------------|------|-------|-------|-------|
| Cerebrovascular disease, n (%)     | 1,526 (23.2%) | 607 (21.1%)   | 0.05 | 22.5% | 22.6% | <0.01 |
| Delusions or hallucinations, n (%) | 251 (3.8%)    | 266 (9.3%)    | 0.22 | 5.8%  | 5.7%  | <0.01 |
| Depression, n (%)                  | 2,072 (31.5%) | 871 (30.3%)   | 0.03 | 31.9% | 30.4% | 0.03  |
| Diabetes mellitus, n (%)           | 2,285 (34.7%) | 947 (32.9%)   | 0.04 | 33.9% | 34.4% | <0.01 |
| Falls, n (%)                       | 1,619 (24.6%) | 679 (23.6%)   | 0.02 | 24.4% | 25.7% | 0.03  |
| Major osteoporotic fracture, n (%) | 975 (14.8%)   | 373 (13.0%)   | 0.05 | 14.3% | 15.6% | 0.04  |
| Unsteady gait, n (%)               | 6,069 (92.1%) | 2,527 (87.9%) | 0.14 | 91.5% | 89.5% | 0.07  |
| Hearing impairment, n (%)          | 2,967 (45.0%) | 1,307 (45.5%) | 0.01 | 45.3% | 45.2% | <0.01 |
| Ischemic heart disease, n (%)      | 1,774 (26.9%) | 678 (23.6%)   | 0.08 | 25.8% | 25.1% | 0.02  |
| Hypertension, n (%)                | 5,564 (84.5%) | 2,296 (79.9%) | 0.12 | 83.4% | 81.2% | 0.06  |
| Chronic kidney disease, n (%)      | 54 (0.8%)     | 10 (0.3%)     | 0.06 | 0.8%  | 0.3%  | 0.06  |
| Chronic liver disease, n (%)       | 64 (1.0%)     | 24 (0.8%)     | 0.01 | 1.0%  | 0.8%  | 0.01  |
| Malignancy, n (%)                  | 612 (9.3%)    | 247 (8.6%)    | 0.02 | 9.0%  | 8.4%  | 0.02  |
| Osteoporosis, n (%)                | 3,044 (46.2%) | 1,252 (43.5%) | 0.05 | 45.9% | 43.8% | 0.04  |
| Parkinsonism, n (%)                | 481 (7.3%)    | 212 (7.4%)    | 0    | 7.4%  | 7.9%  | 0.02  |
| Peripheral vascular disease, n (%) | 496 (7.5%)    | 148 (5.1%)    | 0.1  | 7.3%  | 6.0%  | 0.05  |
| Rheumatoid arthritis, n (%)        | 219 (3.3%)    | 83 (2.9%)     | 0.03 | 3.1%  | 3.5%  | 0.02  |
| Seizure disorder, n (%)            | 237 (3.6%)    | 107 (3.7%)    | 0.01 | 3.7%  | 3.3%  | 0.02  |
| Visual impairment, n (%)           | 5,383 (81.7%) | 2,259 (78.6%) | 0.08 | 81.0% | 80.1% | 0.02  |
| Wheelchair ambulation, n (%)       | 3,676 (55.8%) | 1,364 (47.4%) | 0.17 | 53.3% | 54.9% | 0.03  |

---

*Performance Scales*

Cognitive Performance  
Scale\*

|   |               |               |      |        |       |       |
|---|---------------|---------------|------|--------|-------|-------|
| 0 | 1,007 (15.3%) | 144 (5.0%)    | 0.35 | 12.07% | 12.5% | 0.01  |
| 1 | 855 (13.0%)   | 199 (6.9%)    | 0.2  | 11.02% | 10.5% | 0.02  |
| 2 | 1,261 (19.1%) | 522 (18.2%)   | 0.03 | 18.73% | 18.9% | <0.01 |
| 3 | 2,241 (34.0%) | 1,323 (46.0%) | 0.25 | 37.88% | 38.2% | <0.01 |
| 4 | 437 (6.6%)    | 284 (9.9%)    | 0.12 | 7.82%  | 7.9%  | <0.01 |
| 5 | 519 (7.9%)    | 328 (11.4%)   | 0.12 | 8.92%  | 8.8%  | <0.01 |
| 6 | 268 (4.1%)    | 75 (2.6%)     | 0.08 | 3.57%  | 3.3%  | 0.01  |

Aggressive Behaviour  
Scale\*

|         |               |               |      |        |       |      |
|---------|---------------|---------------|------|--------|-------|------|
| missing | <=5 (0.0%)    | 0 (0.0%)      | 0.02 | 0%     | 0.0%  | N/A  |
| 0       | 3,683 (55.9%) | 1,014 (35.3%) | 0.42 | 50.23% | 46.1% | 0.08 |
| 1       | 863 (13.1%)   | 402 (14.0%)   | 0.03 | 13.28% | 14.6% | 0.04 |
| 2       | 610 (9.3%)    | 364 (12.7%)   | 0.11 | 9.70%  | 11.8% | 0.07 |
| 3       | 582 (8.8%)    | 351 (12.2%)   | 0.11 | 9.35%  | 10.1% | 0.02 |
| 4       | 262 (4.0%)    | 208 (7.2%)    | 0.14 | 4.64%  | 5.5%  | 0.04 |
| 5       | 150 (2.3%)    | 155 (5.4%)    | 0.16 | 2.95%  | 3.7%  | 0.04 |
| 6       | 193 (2.9%)    | 127 (4.4%)    | 0.08 | 3.89%  | 3.1%  | 0.04 |
| 7       | 79 (1.2%)     | 80 (2.8%)     | 0.11 | 1.94%  | 1.8%  | 0.01 |
| 8       | 55 (0.8%)     | 64 (2.2%)     | 0.11 | 1.18%  | 1.3%  | 0.01 |
| 9       | 48 (0.7%)     | 48 (1.7%)     | 0.09 | 1.14%  | 0.9%  | 0.02 |
| 10      | 22 (0.3%)     | 29 (1.0%)     | 0.08 | 0.63%  | 0.6%  | 0.01 |
| 11      | 13 (0.2%)     | 11 (0.4%)     | 0.03 | 0.33%  | 0.2%  | 0.03 |
| 12      | 27 (0.4%)     | 22 (0.8%)     | 0.05 | 0.75%  | 0.4%  | 0.05 |

Depression Rating  
Scale\*

|         |               |             |      |        |       |       |
|---------|---------------|-------------|------|--------|-------|-------|
| missing | <=5 (0.0%)    | 0 (0.0%)    | 0.02 | 0%     | 0.0%  | N/A   |
| 0       | 2,229 (33.8%) | 621 (21.6%) | 0.28 | 30.30% | 27.4% | 0.06  |
| 1       | 1,013 (15.4%) | 413 (14.4%) | 0.03 | 14.74% | 15.0% | <0.01 |
| 2       | 1,068 (16.2%) | 487 (16.9%) | 0.02 | 16.16% | 18.1% | 0.05  |
| 3       | 683 (10.4%)   | 335 (11.7%) | 0.04 | 10.59% | 11.3% | 0.02  |
| 4       | 561 (8.5%)    | 317 (11.0%) | 0.08 | 9.45%  | 10.7% | 0.04  |
| 5       | 382 (5.8%)    | 203 (7.1%)  | 0.05 | 6.54%  | 5.7%  | 0.04  |

|    |            |            |      |       |      |       |
|----|------------|------------|------|-------|------|-------|
| 6  | 247 (3.7%) | 165 (5.7%) | 0.09 | 4.33% | 3.9% | 0.02  |
| 7  | 154 (2.3%) | 120 (4.2%) | 0.1  | 2.85% | 3.2% | 0.02  |
| 8  | 111 (1.7%) | 75 (2.6%)  | 0.06 | 2.06% | 1.7% | 0.03  |
| 9  | 52 (0.8%)  | 53 (1.8%)  | 0.09 | 0.99% | 1.2% | 0.02  |
| 10 | 41 (0.6%)  | 40 (1.4%)  | 0.08 | 0.86% | 0.8% | <0.01 |
| 11 | 26 (0.4%)  | 24 (0.8%)  | 0.06 | 0.58% | 0.7% | 0.01  |
| 12 | 14 (0.2%)  | 10 (0.3%)  | 0.03 | 0.37% | 0.1% | 0.05  |
| 13 | 6 (0.1%)   | <=5 (0.1%) | 0.01 | 0.18% | 0.1% | 0.02  |
| 14 | 0 (0.0%)   | 8 (0.3%)   | 0.07 | 0%    | 0.1% | 0.05  |

Abbreviations: number (n), standard deviation (SD), emergency room (ER), Adjusted Clinical Group (ACG), activities of daily living (ADL)

\*Higher scores indicate poorer performance on the scale (e.g. a Cognitive Performance Scale score of 6 means a patient has very severe cognitive impairment, patients with a higher Aggressive Behavior Scale score are more aggressive, patients with a higher Depression Rating Scale score have more depressive symptoms).

Table 2a. Primary Analyses of Primary and Secondary Outcomes based on Inverse Probability of Treatment Weights Derived from a High Dimensional Propensity Score Model

| Outcome                                   | Crude                                        |                                                          |                      | Weighted                                     |                                                          |                      |
|-------------------------------------------|----------------------------------------------|----------------------------------------------------------|----------------------|----------------------------------------------|----------------------------------------------------------|----------------------|
|                                           | Events/100<br>Person-<br>Years:<br>Trazodone | Events/100<br>Person-Years:<br>Atypical<br>Antipsychotic | HR<br>(95% CI)       | Events/100<br>Person-<br>Years:<br>Trazodone | Events/100<br>Person-Years:<br>Atypical<br>Antipsychotic | HR<br>(95% CI)       |
| Fall or major<br>osteoporotic<br>fracture | 21                                           | 28                                                       | 0.71 (0.60-<br>0.85) | 23                                           | 25                                                       | 0.9 (0.76-<br>1.09)  |
| Fall                                      | 20                                           | 27                                                       | 0.72 (0.60-<br>0.86) | 22                                           | 24                                                       | 0.93 (0.77-<br>1.12) |
| Major<br>osteoporotic<br>fracture         | 7                                            | 8                                                        | 0.81 (0.59-<br>1.12) | 8                                            | 7                                                        | 1.12 (0.79-<br>1.58) |

|                     |    |    |                  |    |    |                  |
|---------------------|----|----|------------------|----|----|------------------|
| Hip fracture        | 4  | 6  | 0.72 (0.48-1.08) | 5  | 5  | 0.97 (0.64-1.48) |
| All-cause mortality | 59 | 74 | 0.78 (0.70-0.86) | 60 | 74 | 0.78 (0.71-0.87) |

Table 2b. Secondary Analyses of Primary and Secondary Outcomes based on Inverse Probability of Treatment Weights Derived from a High Dimensional Propensity Score Model

| Outcome                             | Crude                              |                                                 |                  | Weighted                           |                                                 |                  |
|-------------------------------------|------------------------------------|-------------------------------------------------|------------------|------------------------------------|-------------------------------------------------|------------------|
|                                     | Events/100 Person-Years: Trazodone | Events/100 Person-Years: Atypical Antipsychotic | HR (95% CI)      | Events/100 Person-Years: Trazodone | Events/100 Person-Years: Atypical Antipsychotic | HR (95% CI)      |
| Fall or major osteoporotic fracture | 19                                 | 27                                              | 0.67 (0.56-0.81) | 21                                 | 24                                              | 0.85 (0.71-1.03) |
| Fall                                | 19                                 | 26                                              | 0.68 (0.57-0.82) | 20                                 | 23                                              | 0.87 (0.72-1.05) |
| Major osteoporotic fracture         | 6                                  | 8                                               | 0.74 (0.53-1.03) | 7                                  | 7                                               | 1.02 (0.71-1.44) |
| Hip fracture                        | 4                                  | 6                                               | 0.66 (0.43-0.99) | 4                                  | 5                                               | 0.89 (0.58-1.37) |
| All-cause mortality                 | 83                                 | 103                                             | 0.78 (0.71-0.85) | 88                                 | 100                                             | 0.86 (0.78-0.94) |

Abbreviations: hazard ratio (HR), confidence interval (CI)
